# Supplementary material for: Systematic Evaluation of Normalization Methods for Glycomics Data Based on Performance of Network Inference
Source: Metabolites. 2020 Jul 2;10(7):271. doi: 10.3390/metabo10070271 (PMC7408386; doi:10.3390/metabo10070271)
Supplement: Supplementary file 1 [file metabolites-10-00271-s001.zip]

Archive with 4 entries (4 files):
- SupplementaryFigures.pdf
- __MACOSX/._SupplementaryFigures.pdf
- TableS1.xlsx
- __MACOSX/._TableS1.xlsx
