# Supplementary material for: Systematic Evaluation of Normalization Methods for Glycomics Data Based on Performance of Network Inference
Source: Metabolites. 2020 Jul 2;10(7):271. doi: 10.3390/metabo10070271 (PMC7408386; doi:10.3390/metabo10070271)
Supplement: Supplementary file 1 [file metabolites-10-00271-s001.zip › TableS1.xlsx]

## Sheet: Legend
Sheet	Description
Korcula2013_pval	p-values of the linear model between glycans and age in the Korcula2013 cohort
Korcula2010_pval	p-values of the linear model between glycans and age in the Korcula2010 cohort
Split_pval	p-values of the linear model between glycans and age in the Split cohort
Vis_pval	p-values of the linear model between glycans and age in the Vis cohort
CRC_pval	p-values of the linear model between glycans and age in the CRC controls cohort
LLS_pval	p-values of the linear model between glycans and age in the LLS cohort
Korcula2013_padj	adjusted p-values (using the Benjamini-Hochberg method) of the linear model between glycans and age in the Korcula2013 cohort
Korcula2010_padj	adjusted p-values (using the Benjamini-Hochberg method) of the linear model between glycans and age in the Korcula2010 cohort
Split_padj	adjusted p-values (using the Benjamini-Hochberg method) of the linear model between glycans and age in the Split cohort
Vis_padj	adjusted p-values (using the Benjamini-Hochberg method) of the linear model between glycans and age in the Vis cohort
CRC_padj	adjusted p-values (using the Benjamini-Hochberg method) of the linear model between glycans and age in the CRC controls cohort
LLS_padj	adjusted p-values (using the Benjamini-Hochberg method) of the linear model between glycans and age in the LLS cohort

## Sheet: Korcula2013_pval
	Quotient	QuotientLog	TA	TALog	Qantile	QuantileLog	Raw	RawLog	Median	Rank	RankLog	TAQuotient	TAQuotientLog
IgG1_G0F	1.57375e-05	1.76594e-06	2.89386e-08	5.95289e-09	0.0264345	0.0279759	0.0289414	0.0266247	0.0188884	0.0371586	0.0438628	9.17163e-06	1.04236e-06
IgG1_G1F	0.139427	0.157189	0.117829	0.138804	0.0611956	0.0475448	0.0572916	0.0531587	0.0572797	0.0434775	0.0824934	0.184743	0.210423
IgG1_G2F	1.92905e-08	2.6806e-09	8.59528e-09	1.06043e-08	7.97727e-06	9.10005e-06	6.61013e-06	1.03769e-05	3.07275e-06	1.63193e-05	0.000107013	4.38462e-08	5.77432e-09
IgG1_G0FN	1.4997e-08	1.65789e-11	2.34025e-11	4.39427e-13	0.000342991	0.000152633	0.000839421	0.00016984	0.000149745	0.000157829	0.000729053	6.84455e-09	8.55293e-12
IgG1_G1FN	0.0543658	0.0263677	0.01962	0.023503	0.944721	0.848805	0.95555	0.846534	0.914391	0.838014	0.788511	0.036938	0.0174826
IgG1_G2FN	0.00155533	0.000643338	0.00583847	0.00310458	0.0028454	0.00210181	0.00243729	0.00193466	0.0038995	0.00400869	0.00364752	0.00272728	0.00101476
IgG1_G1FS	0.215244	0.173886	0.10873	0.0921069	0.639351	0.574964	0.677821	0.593392	0.358791	0.476793	0.729803	0.177163	0.13341
IgG1_G2FS	1.35105e-07	3.0903e-08	1.04265e-07	2.06995e-07	6.43926e-05	5.05805e-05	5.09519e-05	3.86147e-05	2.70374e-05	6.07045e-05	0.000422582	2.71372e-07	5.94221e-08
IgG1_G1FNS	0.0650731	0.0285853	0.0378581	0.030818	0.922469	0.900142	0.907847	0.864135	0.0650104	0.880048	0.919179	0.0473979	0.0192391
IgG1_G2FNS	0.0163411	0.0143719	0.0410919	0.0370806	0.0245431	0.0205673	0.0196861	0.0177148	0.506409	0.0236049	0.0331232	0.0240427	0.0202457
IgG1_G0	0.000335409	1.26205e-06	0.000454605	3.24008e-06	0.0118129	0.00379653	0.0493022	0.00455099	0.00101053	0.00430835	0.00489929	0.000288709	9.1013e-07
IgG1_G1	0.361875	0.214885	0.385451	0.24669	0.846307	0.878825	0.86232	0.879667	0.575124	0.836511	0.985109	0.329111	0.18326
IgG1_G2	0.00520646	0.00486518	0.0223949	0.021453	0.00829551	0.00782714	0.00738492	0.00744105	0.00785901	0.00932024	0.0179874	0.00727523	0.00656708
IgG1_G0N	3.23411e-06	1.81871e-09	1.12194e-05	1.09617e-08	0.000555554	3.0344e-05	0.00311298	2.41147e-05	6.02499e-06	3.54808e-05	1.77125e-05	2.66137e-06	1.35005e-09
IgG1_G1N	0.0129902	0.00261497	0.0296985	0.00859718	0.387066	0.327754	0.37951	0.310265	0.000245489	0.379875	0.293768	0.0109636	0.0019589
IgG1_G2N	0.905981	0.968172	0.952692	0.955073	0.399288	0.367364	0.427682	0.344899	0.144205	0.386002	0.386593	0.966365	0.948792
IgG1_G1S	0.0893603	0.0715395	0.0754189	0.0721737	0.981772	0.980974	0.976102	0.973463	0.0764963	0.888702	0.884633	0.069865	0.0545282
IgG1_G2S	0.0235501	0.0248759	0.0741157	0.07552	0.024829	0.022228	0.0220714	0.0199568	0.924673	0.0264993	0.0367542	0.0315614	0.0323876
IgG1_G1NS	0.029976	0.047719	0.0295452	0.0590808	0.570427	0.821708	0.594453	0.887839	0.112519	0.835356	0.865191	0.0211514	0.0363842
IgG1_G2NS	0.155209	0.322355	0.174626	0.28117	0.99665	0.75972	0.901607	0.685711	0.123112	0.708567	0.637231	0.118511	0.268728
IgG2_G0F	0.000399376	5.1841e-05	6.15512e-07	8.0178e-08	0.204842	0.177006	0.194721	0.165065	0.174187	0.27487	0.0939286	0.000272578	3.12486e-05
IgG2_G1F	0.0161369	0.0107895	0.00160321	0.00225979	0.0224768	0.0180657	0.0137655	0.0163233	0.0133007	0.0119421	0.0694908	0.0230627	0.0166136
IgG2_G2F	8.72786e-10	6.9977e-10	1.17013e-10	4.92026e-10	1.90225e-06	2.49875e-06	1.10698e-06	2.62105e-06	5.23841e-07	3.01e-06	0.000127654	1.48026e-09	1.4052e-09
IgG2_G0FN	1.94306e-06	3.8888e-08	3.97592e-08	1.28719e-09	0.048324	0.0124663	0.0425845	0.00995105	0.0193758	0.0157951	0.00519676	1.08417e-06	2.08363e-08
IgG2_G1FN	0.0181051	0.0112758	0.0052157	0.00312518	0.748039	0.990814	0.855867	0.918823	0.775892	0.881274	0.508641	0.0128721	0.00744095
IgG2_G2FN	7.75526e-05	4.36631e-05	0.000327003	0.000208529	0.000143894	0.000129863	0.00012504	0.000115652	0.000514249	0.000176368	0.00114659	0.000115229	6.85232e-05
IgG2_G1FS	0.582821	0.302869	0.428273	0.305545	0.0800562	0.0533598	0.10121	0.0610849	0.12574	0.0350543	0.127362	0.665345	0.37844
IgG2_G2FS	4.78194e-07	7.44861e-08	6.60353e-08	1.2286e-07	1.85565e-05	1.36258e-05	1.94498e-05	1.41066e-05	1.22938e-05	1.16021e-05	0.00038858	6.77384e-07	1.24736e-07
IgG2_G1FNS	0.199938	0.162414	0.193364	0.122199	0.823594	0.648399	0.754142	0.631847	0.116808	0.562673	0.614537	0.162849	0.124751
IgG2_G2FNS	0.0269179	0.0208778	0.0382978	0.0400175	0.0124294	0.0113732	0.0104315	0.00950115	0.543494	0.0118904	0.0314363	0.0358455	0.0283208
IgG2_G0	0.0358664	0.00769646	0.0593064	0.0103292	0.543317	0.3929	0.472861	0.259036	0.0259221	0.527846	0.14123	0.0332712	0.00617909
IgG2_G1	0.202561	0.182135	0.24858	0.276281	0.0295616	0.0377925	0.0500623	0.0777868	0.0896153	0.0212113	0.300947	0.221227	0.213111
IgG2_G2	0.00100918	0.000121521	0.00563747	0.00130877	0.000459527	0.000593369	0.000871347	0.000959099	0.0491195	0.000249554	0.0266012	0.0013335	0.000186431
IgG2_G0N	0.000560193	2.54017e-05	0.00153886	7.83804e-05	0.0404479	0.0149914	0.0506084	0.0107034	0.006935	0.0225894	0.00575687	0.000506452	1.90128e-05
IgG2_G1N	0.659218	0.90045	0.725948	0.965757	0.334484	0.390437	0.295123	0.366562	0.451555	0.281678	0.914838	0.695184	0.963604
IgG2_G2N	0.209192	0.0217042	0.301444	0.0197462	0.942586	0.880987	0.976107	0.887461	0.102615	0.975921	0.652212	0.189476	0.0154442
IgG2_G1S	0.892889	0.929815	0.939284	0.849593	0.166378	0.171338	0.195355	0.247821	0.175233	0.117244	0.520916	0.829568	0.830314
IgG2_G2S	0.0310119	0.00988888	0.0580239	0.0287672	0.0018461	0.00262153	0.00404327	0.00313221	0.946699	0.00154116	0.0504995	0.036145	0.012649
IgG2_G1NS	0.0193791	0.0205468	0.0199695	0.0195042	0.112269	0.0594447	0.0784388	0.0878196	0.120724	0.0494242	0.0805884	0.0170377	0.0183819
IgG2_G2NS	0.639889	0.495473	0.782638	0.587001	0.259311	0.150668	0.200342	0.127228	0.16281	0.173751	0.0932668	0.7696	0.580247
IgG4_G0F	0.269315	0.162518	0.209315	0.131026	0.958093	0.813436	0.975668	0.718989	0.913108	0.838656	0.523798	0.253935	0.146041
IgG4_G1F	0.0145133	0.066174	0.0146158	0.0709302	0.00433034	0.0132694	0.00484084	0.0271187	0.00466735	0.0138296	0.145653	0.0160103	0.0759095
IgG4_G2F	4.56158e-05	0.000224942	4.447e-05	0.000295675	3.34679e-05	0.000101309	7.50327e-05	0.000267329	5.38944e-05	9.3172e-05	0.00746463	5.42126e-05	0.000287211
IgG4_G0FN	0.00888576	0.0067231	0.00655547	0.00536911	0.279081	0.208163	0.245049	0.157217	0.0812086	0.24471	0.156679	0.00784961	0.005648
IgG4_G1FN	0.628876	0.885886	0.715518	0.939168	0.156471	0.248871	0.181543	0.344091	0.327132	0.239428	0.600144	0.663382	0.937582
IgG4_G2FN	0.0118282	0.0430101	0.0219878	0.0577876	0.00436432	0.0104337	0.00626044	0.0177542	0.734903	0.00994491	0.0963533	0.0137511	0.0498181
IgG4_G1FS	0.0505892	0.132602	0.0595012	0.142847	0.0135062	0.0256074	0.0154254	0.0515429	0.0406731	0.0238363	0.171819	0.0545857	0.147861
IgG4_G2FS	5.45708e-05	0.000253155	7.37773e-05	0.000363852	7.05873e-05	0.000138704	0.000200481	0.000329891	0.000151993	0.000122575	0.00678375	6.48567e-05	0.000320984
IgG4_G1FNS	0.533295	0.597994	0.622207	0.656104	0.177557	0.191731	0.214725	0.232905	0.190863	0.163269	0.436769	0.561866	0.646429
IgG4_G2FNS	0.0145742	0.0536852	0.0274609	0.0721895	0.0120352	0.0202063	0.0157188	0.0319015	0.316761	0.0183313	0.109374	0.0170487	0.0621439

## Sheet: Korcula2010_pval
	Quotient	QuotientLog	TA	TALog	Qantile	QuantileLog	Raw	RawLog	Median	Rank	RankLog	TAQuotient	TAQuotientLog
IgG1_G0F	2.29629e-29	3.44085e-33	1.21068e-28	7.08378e-30	5.57905e-24	8.77663e-22	4.35716e-23	1.82004e-22	3.00581e-24	4.04823e-24	1.06731e-16	9.72773e-30	1.2094e-33
IgG1_G1F	0.130862	0.220724	0.0589583	0.0265414	0.000569215	0.00430476	0.000725593	0.00435173	0.000577888	0.00562695	0.0219797	0.117834	0.187209
IgG1_G2F	1.36084e-34	5.23819e-40	7.30183e-50	8.58107e-49	1.65209e-07	2.05574e-05	2.37666e-07	2.0115e-05	3.55613e-09	2.38218e-06	0.000925051	2.32974e-34	1.04901e-39
IgG1_G0FN	5.07701e-36	3.91347e-48	1.22884e-32	3.22124e-40	1.7586e-28	1.60863e-28	2.52949e-26	2.04911e-29	5.91497e-30	1.36178e-31	2.89648e-23	1.9239e-36	1.13108e-48
IgG1_G1FN	0.000147807	3.5094e-07	0.0916821	0.0849643	5.86748e-08	8.38166e-07	6.22488e-08	9.92861e-07	4.88768e-09	2.87386e-07	2.75548e-05	0.00011235	2.11392e-07
IgG1_G2FN	2.37511e-09	1.00274e-17	9.21212e-20	2.80938e-23	0.0142466	0.0279379	0.01437	0.0267548	6.76056e-10	0.0106476	0.0689825	3.08924e-09	1.8392e-17
IgG1_G1FS	5.01989e-08	2.70789e-11	8.97169e-06	6.08682e-05	3.74945e-10	1.47916e-07	3.89053e-10	9.37185e-08	2.02513e-15	3.12253e-08	2.43487e-05	3.62469e-08	1.29615e-11
IgG1_G2FS	1.05367e-15	4.40871e-26	1.38496e-31	1.40766e-32	0.00119416	0.0019893	0.00143557	0.00168972	0.000272386	0.00090562	0.00682301	1.09773e-15	6.0033e-26
IgG1_G1FNS	0.000647194	7.5765e-09	0.00625423	0.00833569	3.5918e-08	3.35358e-06	4.07412e-08	2.53024e-06	0.554226	8.06813e-07	0.000183335	0.00056416	3.88811e-09
IgG1_G2FNS	0.386416	0.00365953	0.000116748	7.9608e-07	0.199564	0.495536	0.184338	0.534746	0.114535	0.491523	0.760301	0.401625	0.00445774
IgG1_G0	2.5298e-20	1.39762e-40	6.6962e-15	2.0038e-27	1.46257e-23	9.33215e-25	1.48003e-18	1.32172e-25	3.8733e-25	2.1419e-26	1.76183e-20	2.31426e-20	8.86652e-41
IgG1_G1	0.22778	0.11299	0.904413	0.703014	0.00370744	0.00529891	0.00649413	0.00437857	0.00573884	0.00226658	0.0157921	0.213973	0.101634
IgG1_G2	1.87859e-13	2.23839e-15	5.78597e-15	8.04072e-17	0.000399293	0.00223907	0.000445563	0.00164554	5.63519e-12	0.00138851	0.0111689	2.91293e-13	3.56273e-15
IgG1_G0N	1.3273e-33	3.56592e-53	3.94217e-24	1.69326e-36	2.31237e-28	1.53166e-30	1.30096e-23	7.41171e-31	1.27206e-12	2.96626e-31	7.46944e-26	9.28952e-34	1.92664e-53
IgG1_G1N	0.000361303	8.65916e-07	0.0450562	0.0242933	1.65915e-06	6.60097e-06	2.7414e-06	3.24749e-06	0.000396072	1.88572e-06	9.02183e-05	0.000303256	6.50887e-07
IgG1_G2N	4.36895e-05	1.6871e-05	2.01415e-07	4.57213e-08	0.434267	0.611151	0.438851	0.693748	0.0391092	0.371335	0.799836	5.57496e-05	2.17979e-05
IgG1_G1S	0.00389878	0.00735393	0.387584	0.790771	8.54036e-05	0.00528588	5.34034e-05	0.00285103	0.334623	0.00109705	0.0603276	0.00397188	0.0058171
IgG1_G2S	5.52785e-19	4.63713e-22	6.23123e-20	6.19887e-22	0.000272868	0.000506454	0.000477927	0.00046985	1.77829e-17	0.000413728	0.00235275	7.54947e-19	6.52432e-22
IgG1_G1NS	0.868059	0.766564	0.19977	0.106546	0.010488	0.0373057	0.0115209	0.0304513	0.142058	0.0190511	0.107402	0.853007	0.723898
IgG1_G2NS	0.0463362	0.0132701	0.000117312	7.43306e-05	0.125951	0.827407	0.0783936	0.823672	0.110086	0.429502	0.587519	0.045825	0.0149862
IgG2_G0F	2.30998e-31	9.42558e-36	7.18478e-43	2.87035e-43	1.86686e-24	2.79259e-22	3.88856e-25	1.09785e-21	7.73024e-26	1.39696e-25	4.13887e-17	4.57307e-31	4.35278e-36
IgG2_G1F	0.948533	0.707803	2.15161e-06	3.61211e-06	0.0368878	0.0317397	0.0397169	0.0355052	0.0401783	0.0543625	0.0491972	0.84766	0.768274
IgG2_G2F	6.59661e-14	5.72759e-30	1.54748e-52	2.32711e-53	1.38244e-08	1.24521e-05	6.64529e-08	5.30154e-05	2.09148e-09	4.38053e-07	0.00132314	5.2588e-13	1.58584e-29
IgG2_G0FN	7.34503e-34	9.53821e-44	4.56296e-38	9.19878e-44	5.24223e-25	8.09166e-24	1.92035e-25	1.7133e-23	2.61295e-28	1.5596e-26	4.75809e-19	1.86635e-33	5.01373e-44
IgG2_G1FN	0.81884	0.582609	0.000696212	7.37585e-05	0.0262656	0.041927	0.0259248	0.0405257	0.0268043	0.0526242	0.0827478	0.706037	0.641076
IgG2_G2FN	4.1432e-10	2.06002e-26	3.99891e-32	4.20296e-38	4.37675e-06	9.07212e-05	5.00233e-06	0.000108402	5.91375e-16	7.88265e-06	0.00174652	1.89706e-09	5.86414e-26
IgG2_G1FS	0.345815	0.557855	0.00546764	0.00275003	0.00408255	0.0106649	0.00368824	0.0135864	0.00297635	0.00639726	0.0353078	0.292125	0.507817
IgG2_G2FS	8.13094e-08	4.46432e-24	3.4033e-35	2.54229e-39	5.89235e-05	0.00075193	0.000115263	0.00102414	2.58119e-05	0.000259619	0.00681048	2.75167e-07	8.86567e-24
IgG2_G1FNS	0.00854353	0.0176959	0.740887	0.298166	0.000132549	0.00124107	0.000187217	0.00172837	0.40632	0.000777827	0.00940595	0.00689718	0.0142991
IgG2_G2FNS	0.00146066	7.1819e-11	1.86281e-15	3.82064e-20	0.360943	0.258412	0.370119	0.281937	0.00764857	0.230826	0.251417	0.00273917	1.21981e-10
IgG2_G0	1.60569e-11	3.27174e-20	4.08771e-07	4.99726e-12	1.51738e-12	2.57726e-12	1.55202e-09	6.56679e-13	4.04693e-10	2.93412e-13	4.95984e-10	1.74181e-11	2.61899e-20
IgG2_G1	0.114549	0.16668	0.00220007	0.00136427	0.39936	0.223651	0.518596	0.234887	0.170954	0.201162	0.196242	0.128805	0.187829
IgG2_G2	1.63731e-12	1.5736e-14	9.50003e-15	6.2752e-19	0.00250258	0.0287647	0.00269107	0.0169152	2.38358e-05	0.010077	0.13173	3.63997e-12	3.29087e-14
IgG2_G0N	1.33322e-24	3.18966e-37	3.49925e-15	3.33101e-24	6.65668e-20	1.40634e-22	1.34984e-15	7.24286e-23	0.28086	6.12331e-23	7.93004e-20	1.33293e-24	3.56827e-37
IgG2_G1N	0.00130434	0.000223553	0.668349	0.355373	0.000159918	7.01098e-05	0.00019511	6.93565e-05	0.400413	3.97414e-05	0.000237789	0.00113234	0.000184797
IgG2_G2N	1.62485e-07	4.31164e-13	4.24816e-15	2.58519e-21	0.00639025	0.150321	0.00978706	0.121956	0.0339925	0.0570559	0.565866	4.67424e-07	1.07987e-12
IgG2_G1S	0.391694	0.540928	0.128979	0.114699	0.0564501	0.0608796	0.0735665	0.0695937	0.45936	0.0926125	0.0942582	0.35525	0.50322
IgG2_G2S	3.74566e-11	6.75751e-32	2.48127e-29	7.54875e-36	3.49067e-07	1.08828e-05	3.58589e-07	8.37606e-06	5.79889e-24	3.29238e-06	0.000311902	1.54827e-10	1.40365e-31
IgG2_G1NS	0.0264184	0.0120158	2.69968e-08	1.08239e-06	0.817768	0.877188	0.94207	0.576117	0.0797529	0.923881	0.710347	0.0375134	0.0144673
IgG2_G2NS	6.59539e-10	2.27068e-16	2.09691e-23	1.54633e-25	0.0223818	0.0135019	0.0227739	0.0133733	0.0525605	0.0177121	0.0190831	2.34685e-09	4.27288e-16
IgG4_G0F	1.22869e-09	5.37402e-12	3.42677e-08	8.81452e-09	2.61151e-09	1.42354e-09	4.2743e-08	1.29293e-09	1.9794e-08	3.32825e-09	3.81209e-08	8.45738e-10	4.15925e-12
IgG4_G1F	0.666008	0.347425	0.298827	0.737937	0.113501	0.0346199	0.200636	0.0510456	0.238481	0.0825979	0.028352	0.648507	0.330198
IgG4_G2F	6.21891e-06	6.33669e-06	1.31788e-09	2.20934e-08	0.0426923	0.110826	0.0439976	0.0831004	0.00324735	0.0760167	0.218763	5.98221e-06	7.46486e-06
IgG4_G0FN	2.63598e-17	1.84167e-18	1.06154e-14	1.04395e-13	2.25311e-13	1.49026e-12	7.50706e-12	5.26886e-13	1.09517e-13	1.13012e-12	4.1794e-10	1.29751e-17	1.33724e-18
IgG4_G1FN	0.0286551	0.016337	0.444123	0.328733	0.00445047	0.0025857	0.00776173	0.00357226	0.00812289	0.00859876	0.00493821	0.0249249	0.0148055
IgG4_G2FN	0.000894314	0.000506425	8.39404e-06	1.30036e-05	0.279133	0.193506	0.388521	0.210585	0.0028886	0.167608	0.182278	0.000925153	0.000573075
IgG4_G1FS	0.325403	0.169215	0.829422	0.895	0.0500973	0.0226206	0.0770327	0.0272149	0.174728	0.0535538	0.0240326	0.315952	0.159107
IgG4_G2FS	0.000486997	5.76155e-06	1.07167e-06	2.60427e-08	0.100849	0.0941427	0.186705	0.0807619	0.086575	0.0822517	0.123564	0.000493382	6.73245e-06
IgG4_G1FNS	0.0719004	0.104602	0.380068	0.512947	0.0137818	0.0197335	0.0139661	0.0220581	0.246415	0.0443502	0.0405824	0.0676556	0.0992386
IgG4_G2FNS	0.862107	0.393149	0.128077	0.054991	0.40085	0.491485	0.419401	0.526337	0.09303	0.448683	0.624305	0.89396	0.409818

## Sheet: Split_pval
	Quotient	QuotientLog	TA	TALog	Qantile	QuantileLog	Raw	RawLog	Median	Rank	RankLog	TAQuotient	TAQuotientLog
IgG1_G0F	1.22027e-24	9.73658e-26	5.24989e-27	8.31345e-28	1.34177e-21	5.95477e-23	2.18012e-21	3.25639e-23	3.73392e-22	5.44487e-23	2.42334e-17	1.09126e-24	1.07562e-25
IgG1_G1F	0.000820202	0.000381183	7.79022e-08	2.32177e-08	0.0265808	0.0102838	0.0237997	0.0120428	0.0220837	0.00937213	0.013588	0.000808749	0.00036364
IgG1_G2F	6.10158e-68	1.17851e-69	3.38986e-74	1.99107e-73	1.10439e-41	2.98438e-45	6.05458e-44	8.33873e-45	1.37409e-47	6.64451e-46	7.11671e-34	3.7274e-68	1.02265e-69
IgG1_G0FN	1.1163e-47	2.03396e-60	3.02578e-47	2.03717e-56	1.97158e-39	3.89703e-46	1.05363e-37	2.29089e-46	1.33417e-40	1.25768e-46	2.29436e-38	1.0102e-47	2.31685e-60
IgG1_G1FN	7.48425e-08	8.22942e-08	0.000178865	0.000389007	2.4309e-05	5.06895e-05	1.57026e-05	4.77966e-05	4.08627e-06	4.21237e-05	0.00139565	7.60079e-08	8.60966e-08
IgG1_G2FN	2.17767e-19	7.88517e-22	1.01938e-17	5.56762e-20	1.16725e-09	2.34576e-11	3.95989e-10	1.67216e-11	5.33246e-12	9.75263e-11	9.83195e-11	1.68968e-19	6.63237e-22
IgG1_G1FS	0.0123629	0.0159523	0.15695	0.253346	0.0186196	0.0297993	0.0180376	0.028764	0.00261969	0.0421551	0.0872867	0.0123087	0.0164851
IgG1_G2FS	9.41483e-62	5.38155e-64	1.11417e-60	1.56001e-61	2.09126e-32	2.93723e-36	1.4901e-33	3.53129e-36	5.17007e-37	8.20971e-37	1.95359e-28	5.47334e-62	4.66889e-64
IgG1_G1FNS	5.82822e-05	0.000115133	0.0142554	0.0351948	0.000474459	0.00294821	0.000748855	0.00388915	0.0318792	0.00447641	0.0564539	5.90385e-05	0.000119099
IgG1_G2FNS	1.52793e-08	4.61421e-10	1.62315e-08	3.81773e-10	0.000635076	5.5068e-05	0.000360679	3.47686e-05	0.353544	0.000126522	1.14103e-05	1.40339e-08	4.30008e-10
IgG1_G0	3.13191e-39	1.50542e-51	1.09678e-30	2.03668e-40	2.58448e-33	2.18909e-40	8.05527e-30	1.0486e-40	4.47436e-50	1.64028e-39	7.68761e-37	3.09858e-39	1.71596e-51
IgG1_G1	0.0137172	0.0177495	0.128429	0.223007	0.0510813	0.030607	0.0592016	0.0327595	0.00527262	0.0330265	0.0345208	0.0136777	0.018198
IgG1_G2	5.08044e-20	6.47527e-25	1.87307e-15	1.47475e-20	1.0151e-13	7.19563e-16	1.01364e-12	9.07068e-16	1.71462e-22	2.42981e-16	1.93455e-13	5.89614e-20	6.42808e-25
IgG1_G0N	2.3618e-51	6.04813e-74	4.2401e-39	1.19701e-59	1.51619e-44	1.02236e-56	4.53029e-35	6.44031e-58	1.73685e-35	9.17587e-57	4.176e-53	2.41198e-51	6.52914e-74
IgG1_G1N	8.20441e-11	1.31663e-12	1.74125e-06	2.73193e-07	4.99448e-07	1.8919e-08	1.27242e-06	1.42242e-08	6.39554e-16	1.61712e-08	4.7138e-08	8.58342e-11	1.41725e-12
IgG1_G2N	0.0688073	0.0320597	0.0292162	0.00905244	0.248256	0.204739	0.251003	0.206869	0.743687	0.259148	0.203654	0.0676488	0.0313067
IgG1_G1S	4.97588e-06	0.00010683	0.000723888	0.0154047	0.000804407	0.00184953	0.000600891	0.0033576	0.109288	0.000636902	0.0417891	5.07563e-06	0.000110325
IgG1_G2S	3.4991e-20	6.05649e-25	4.26158e-15	9.10383e-20	1.8493e-11	1.12845e-13	8.60494e-11	1.47293e-13	3.88973e-14	4.65175e-13	8.23587e-13	3.96006e-20	5.99807e-25
IgG1_G1NS	0.00240084	0.0476287	0.0419279	0.3529	0.00399412	0.0300749	0.00532127	0.0936774	0.333712	0.0141496	0.476945	0.00257625	0.0484721
IgG1_G2NS	0.0894861	0.0556278	0.00518859	0.00552227	0.569503	0.399476	0.477158	0.263492	0.61117	0.585426	0.201489	0.0867342	0.0540986
IgG2_G0F	2.1741e-47	2.04384e-48	1.02479e-66	2.67964e-67	2.73208e-34	7.12171e-38	5.48291e-34	7.0035e-38	1.35718e-34	6.53341e-38	5.34333e-30	2.22528e-47	2.17504e-48
IgG2_G1F	0.0456623	0.014913	4.10176e-07	8.11495e-07	0.238518	0.128004	0.15848	0.115884	0.158552	0.0912717	0.144811	0.0437599	0.0142185
IgG2_G2F	4.85274e-52	8.64009e-51	1.3509e-65	6.4567e-63	2.55907e-32	2.9841e-35	7.35827e-35	2.75756e-35	2.74742e-36	2.64192e-36	3.61019e-26	2.559e-52	5.54325e-51
IgG2_G0FN	1.98566e-74	9.29855e-86	2.25656e-80	1.24377e-88	2.40807e-51	6.12721e-60	1.4491e-51	3.68452e-60	2.34627e-54	2.2498e-59	1.80604e-50	1.87181e-74	1.00182e-85
IgG2_G1FN	1.50736e-34	1.14651e-33	1.15652e-38	3.53429e-37	3.35951e-21	3.60832e-22	9.40218e-22	3.64275e-22	1.35421e-24	5.15421e-21	2.06463e-17	1.40578e-34	1.11836e-33
IgG2_G2FN	1.04512e-19	3.20126e-22	7.07443e-21	4.78688e-23	7.8321e-11	9.68264e-14	3.01354e-11	8.44289e-14	1.21048e-11	3.95274e-14	7.15093e-13	7.8878e-20	2.63826e-22
IgG2_G1FS	0.202517	0.0347214	0.000220058	5.98926e-05	0.412728	0.175363	0.386128	0.185141	0.416322	0.121486	0.1191	0.201948	0.0334429
IgG2_G2FS	1.72192e-39	5.03101e-45	8.11671e-49	6.44386e-52	1.43943e-25	6.57699e-30	6.30016e-27	5.28406e-30	4.89184e-28	8.94717e-32	7.02076e-24	1.25806e-39	3.63724e-45
IgG2_G1FNS	1.63997e-07	2.1053e-06	0.000197323	0.000936473	1.40175e-05	0.000287618	8.46341e-06	0.000174446	0.0379083	0.00109548	0.0202857	1.76529e-07	2.18513e-06
IgG2_G2FNS	0.000148144	8.4362e-07	6.66823e-07	8.54086e-09	0.00789798	0.000365622	0.0143589	0.00053922	0.552186	0.000201053	7.89726e-05	0.000137006	7.74366e-07
IgG2_G0	1.94269e-14	2.31828e-17	7.5708e-11	1.13337e-12	3.50525e-11	3.13674e-13	1.48654e-10	1.73875e-13	1.1297e-17	3.2991e-13	1.95184e-12	2.08165e-14	2.41325e-17
IgG2_G1	0.017358	0.0153462	0.00490545	0.00345465	0.0547604	0.100206	0.0418042	0.0875661	0.0151694	0.0891917	0.404986	0.0171217	0.0149697
IgG2_G2	1.77846e-24	5.8981e-28	7.95713e-21	3.71438e-25	2.39474e-17	2.74877e-17	3.59151e-17	2.16118e-17	3.64262e-23	2.88888e-18	1.52796e-11	1.77233e-24	5.12425e-28
IgG2_G0N	4.08102e-28	9.9113e-35	1.45159e-21	2.06379e-26	1.54081e-23	1.53565e-26	7.24766e-21	1.90191e-26	2.04159e-10	7.6591e-27	7.06512e-22	4.43874e-28	1.03487e-34
IgG2_G1N	1.37128e-07	3.60687e-08	0.00162955	0.000417801	0.000173843	1.96045e-05	0.000154898	2.15554e-05	0.00273613	9.7442e-06	2.27809e-05	1.50922e-07	3.75136e-08
IgG2_G2N	4.48714e-07	5.14102e-07	0.0114598	0.00202034	0.00183402	0.000306	0.00110092	0.000280223	0.169206	0.000390549	0.000117604	5.17706e-07	5.51462e-07
IgG2_G1S	0.449159	0.591559	0.0487063	0.106601	0.467068	0.847674	0.536683	0.929154	0.666132	0.983154	0.648308	0.441255	0.582714
IgG2_G2S	2.67514e-29	3.25908e-32	6.56567e-24	1.30686e-27	7.4276e-19	3.10576e-19	1.73855e-18	1.84458e-19	1.23381e-12	6.79741e-19	5.54625e-14	2.8751e-29	2.80786e-32
IgG2_G1NS	0.00130113	0.0577165	0.0466363	0.313356	0.000952469	0.00533787	0.00252619	0.048352	0.322422	0.00150642	0.149547	0.00136073	0.0586558
IgG2_G2NS	4.38526e-17	5.88876e-17	5.04707e-21	5.43624e-21	4.96026e-07	8.66878e-08	2.09529e-07	7.33966e-08	0.933829	2.03437e-07	1.14856e-06	3.50083e-17	5.17256e-17
IgG4_G0F	8.21824e-06	2.91758e-06	1.56836e-06	7.5773e-06	4.33792e-07	1.79035e-06	3.82919e-07	4.05374e-06	2.29568e-07	2.35384e-06	0.000195528	8.37762e-06	3.01868e-06
IgG4_G1F	0.00966962	0.0634573	0.00104648	0.00984874	0.0615933	0.0972482	0.05299	0.10921	0.0537013	0.0940948	0.314762	0.00945508	0.062894
IgG4_G2F	1.56394e-12	1.41293e-11	5.43532e-17	2.07468e-14	1.52613e-11	9.99449e-11	2.71024e-11	3.50255e-10	1.40344e-11	1.6058e-10	4.61509e-07	1.43762e-12	1.38836e-11
IgG4_G0FN	5.04651e-17	2.3737e-17	3.20673e-18	1.15048e-16	4.25435e-18	6.46615e-17	6.22859e-17	7.0252e-16	3.38421e-18	3.93311e-16	2.92884e-11	6.2258e-17	2.61636e-17
IgG4_G1FN	0.0773802	0.0546104	0.101469	0.176212	0.0183347	0.0423291	0.0147759	0.0545795	0.00714691	0.0885627	0.124289	0.0800655	0.0554201
IgG4_G2FN	0.000185842	0.000304875	3.26047e-05	2.66642e-05	0.0031039	0.00147931	0.00571703	0.00161187	0.0363542	0.000744417	0.00411004	0.000178698	0.000300824
IgG4_G1FS	0.047587	0.14674	0.0123666	0.0361838	0.261529	0.226522	0.237329	0.223851	0.29039	0.185244	0.34812	0.0468768	0.145652
IgG4_G2FS	2.29167e-12	3.18002e-12	3.59878e-16	8.21882e-15	1.27371e-10	9.67174e-11	5.54792e-10	1.96681e-10	2.96478e-10	8.19742e-11	7.75853e-08	2.21072e-12	3.12638e-12
IgG4_G1FNS	0.109109	0.139908	0.134278	0.325044	0.0427682	0.118348	0.0226852	0.138893	0.148653	0.224489	0.306874	0.112472	0.141223
IgG4_G2FNS	0.0127034	0.0076943	0.00491618	0.00161401	0.0920675	0.0247199	0.159817	0.0217464	0.933924	0.0128084	0.0181728	0.0124974	0.00761768

## Sheet: Vis_pval
	Quotient	QuotientLog	TA	TALog	Qantile	QuantileLog	Raw	RawLog	Median	Rank	RankLog	TAQuotient	TAQuotientLog
IgG1_G0F	8.35027e-28	7.94264e-34	2.81881e-24	6.86712e-27	7.1965e-22	6.50668e-18	5.65237e-22	7.82526e-19	1.38006e-23	1.13034e-21	1.78211e-12	1.35194e-27	9.06257e-34
IgG1_G1F	0.0150014	0.00392109	0.081761	0.114729	0.733287	0.762335	0.832897	0.790917	0.705942	0.832499	0.510246	0.0181062	0.00454012
IgG1_G2F	1.45629e-23	3.21779e-26	1.82649e-35	2.09496e-35	6.18809e-21	5.61242e-18	3.373e-21	3.74284e-18	8.88117e-23	2.01948e-19	9.97577e-13	1.04837e-23	2.18246e-26
IgG1_G0FN	3.94767e-30	2.00399e-37	3.19435e-21	2.47455e-25	1.39983e-21	4.65018e-19	1.24652e-21	7.48664e-20	3.03422e-26	2.48161e-23	1.93603e-14	6.7411e-30	2.36079e-37
IgG1_G1FN	0.000181817	2.38066e-05	0.649393	0.771595	0.310154	0.576327	0.335244	0.592735	0.129141	0.409176	0.859344	0.000250239	2.95315e-05
IgG1_G2FN	6.13969e-16	7.89172e-17	2.20035e-22	1.624e-22	1.90862e-14	4.04712e-13	1.10435e-14	3.65931e-13	3.53036e-14	3.68173e-14	7.13716e-10	4.50583e-16	5.92187e-17
IgG1_G1FS	2.99309e-08	9.61879e-10	0.0358704	0.0303006	0.00477635	0.0388028	0.00600938	0.0365274	2.51489e-08	0.0165569	0.164373	4.11214e-08	1.20493e-09
IgG1_G2FS	5.00713e-18	5.35882e-24	2.99857e-29	1.7438e-31	9.66336e-17	4.03505e-15	7.11478e-17	2.25692e-15	5.98748e-18	1.2502e-16	3.47432e-11	3.51127e-18	3.68831e-24
IgG1_G1FNS	0.000162076	2.43449e-05	0.854323	0.922642	0.235858	0.473311	0.201982	0.475301	2.98685e-05	0.449395	0.745161	0.000210238	2.96248e-05
IgG1_G2FNS	5.72647e-06	5.88726e-07	3.73751e-12	3.75745e-13	3.48442e-06	1.59299e-06	3.82707e-06	2.24812e-06	0.130852	3.91808e-07	1.35245e-05	4.40961e-06	4.69643e-07
IgG1_G0	5.70275e-20	8.50578e-33	5.13561e-12	2.19747e-21	5.35112e-17	3.69341e-19	2.53737e-13	1.49741e-19	1.03566e-25	3.82036e-19	9.07838e-18	6.90812e-20	1.109e-32
IgG1_G1	0.0770458	0.00457417	0.521294	0.897449	0.540984	0.457454	0.521419	0.5174	0.0126538	0.80778	0.420381	0.0841691	0.00505283
IgG1_G2	5.54212e-09	1.73724e-08	5.97212e-12	4.61968e-12	4.31168e-09	3.87559e-08	6.86187e-09	1.0183e-08	3.86195e-08	3.73097e-09	3.37706e-06	4.60696e-09	1.51243e-08
IgG1_G0N	6.42143e-24	7.99237e-39	3.81767e-13	1.86598e-25	7.92901e-18	1.18617e-22	1.31513e-13	8.78266e-23	3.05111e-22	5.74069e-22	2.07203e-22	9.1655e-24	1.15366e-38
IgG1_G1N	0.00205931	5.48063e-06	0.771866	0.146004	0.11083	0.064158	0.144347	0.0707605	9.93726e-10	0.128733	0.058237	0.00245067	6.52234e-06
IgG1_G2N	7.7403e-06	3.17589e-05	4.47913e-09	4.77082e-09	1.19364e-05	1.12195e-05	2.13324e-05	1.32555e-05	0.0196923	8.49246e-06	8.67776e-05	6.61611e-06	2.80177e-05
IgG1_G1S	0.0066713	0.00947734	0.985687	0.765635	0.298736	0.801404	0.226338	0.778533	6.35008e-07	0.664551	0.762014	0.00799168	0.0103596
IgG1_G2S	1.11793e-18	2.70167e-20	2.17463e-21	5.74746e-23	7.72448e-15	8.33378e-14	2.14944e-14	2.08204e-14	3.51568e-17	4.71704e-15	1.10853e-10	9.2553e-19	2.18191e-20
IgG1_G1NS	0.394978	0.318774	0.137738	0.0647054	0.680799	0.293693	0.713203	0.333177	0.0027215	0.55607	0.146879	0.421822	0.334966
IgG1_G2NS	0.0284448	0.0554345	4.50573e-06	0.000414581	0.00922791	0.00467418	0.00876878	0.00937747	0.00540993	0.000989337	0.0064424	0.0259436	0.0529221
IgG2_G0F	3.20397e-36	1.02685e-41	1.14399e-44	2.74221e-47	5.8354e-27	1.31117e-24	1.97053e-27	8.55354e-24	3.40414e-28	2.22255e-28	4.02231e-19	5.36161e-36	1.30848e-41
IgG2_G1F	0.638595	0.717262	5.89343e-10	2.22656e-10	0.00323096	0.0118846	0.00786893	0.0266283	0.0091667	0.0105385	0.050529	0.665106	0.757917
IgG2_G2F	2.27214e-28	1.11933e-32	4.2347e-55	3.47559e-57	3.82989e-32	1.29656e-26	3.32734e-32	9.21119e-26	8.87305e-34	4.2164e-30	2.34062e-18	2.91109e-28	5.81806e-33
IgG2_G0FN	1.3811e-38	1.58352e-44	1.30089e-34	2.62664e-37	2.32198e-25	7.93365e-24	2.66693e-25	6.2938e-23	1.65916e-28	1.0143e-28	8.35168e-19	3.43163e-38	2.37199e-44
IgG2_G1FN	0.450755	0.320585	4.06881e-08	1.94792e-09	0.000320787	0.000902605	0.000372956	0.00154662	0.000780508	0.000420434	0.00670348	0.427279	0.293604
IgG2_G2FN	2.37398e-28	8.03133e-34	3.05497e-40	2.27054e-45	1.06162e-29	1.41229e-25	8.88238e-30	3.22018e-26	2.0192e-30	1.06767e-28	2.10505e-18	3.16102e-28	5.214e-34
IgG2_G1FS	0.843645	0.772096	1.24834e-08	3.38217e-09	0.000668604	0.00452584	0.00138059	0.00987321	0.00322068	0.00279454	0.0336971	0.826803	0.734551
IgG2_G2FS	7.80003e-28	1.44989e-30	5.51259e-50	7.75296e-51	2.11462e-29	2.49698e-23	2.4026e-29	6.46697e-23	2.6923e-30	4.19621e-26	8.35535e-16	9.84783e-28	7.88923e-31
IgG2_G1FNS	0.0511836	0.0715459	0.00292905	0.000826682	0.132396	0.231762	0.161125	0.243412	0.00477522	0.309521	0.411179	0.0563672	0.0800008
IgG2_G2FNS	6.63964e-15	8.31232e-17	1.17187e-27	3.01532e-30	6.47222e-18	1.42947e-14	8.92991e-18	2.86874e-14	0.312578	1.16049e-15	3.72706e-10	7.43292e-15	5.38134e-17
IgG2_G0	6.13817e-07	1.41095e-14	0.00100675	9.16319e-08	6.24854e-07	1.13801e-07	0.000173763	1.2561e-07	3.47979e-09	1.12166e-07	3.34818e-07	6.79942e-07	1.66852e-14
IgG2_G1	0.211259	0.583054	0.00131378	0.00262595	0.00921505	0.0382746	0.017489	0.0334414	0.565325	0.0109857	0.156106	0.201354	0.561833
IgG2_G2	2.51228e-07	2.15395e-09	5.95693e-11	1.09078e-15	6.76831e-13	1.2455e-10	5.0108e-10	2.19577e-11	0.0332288	4.5249e-13	2.16226e-07	2.16732e-07	1.78601e-09
IgG2_G0N	8.64792e-15	1.91601e-25	4.935e-07	3.31764e-15	1.9158e-12	5.8867e-16	9.81707e-09	1.42223e-15	1.73906e-08	5.36086e-15	5.47776e-16	1.2111e-14	2.61429e-25
IgG2_G1N	0.123694	0.00368526	0.10358	0.510869	0.694091	0.84241	0.52119	0.88025	0.00180921	0.996105	0.482957	0.136097	0.0042383
IgG2_G2N	1.53983e-18	1.79315e-20	2.47994e-26	5.07085e-31	1.75631e-19	7.87831e-17	2.90758e-19	4.74203e-17	0.0923998	3.2544e-18	2.75572e-12	1.78977e-18	1.34917e-20
IgG2_G1S	0.303928	0.2159	4.40924e-07	5.67696e-07	0.0103048	0.0161531	0.00994921	0.0214305	0.244244	0.0104127	0.0402023	0.301722	0.201862
IgG2_G2S	2.32021e-39	7.00323e-45	1.49285e-47	1.58531e-52	3.82906e-33	1.40905e-27	7.75873e-33	3.64468e-29	5.13445e-35	1.25596e-31	4.69071e-19	3.29978e-39	4.18304e-45
IgG2_G1NS	8.8419e-06	3.75867e-06	2.35842e-14	7.63206e-14	3.0865e-10	3.78625e-09	1.2981e-09	6.16345e-08	0.0205722	1.07571e-09	5.14578e-07	8.18385e-06	3.16557e-06
IgG2_G2NS	7.07353e-06	3.85219e-08	4.44372e-15	2.74864e-17	1.51649e-10	5.59511e-10	9.74281e-11	1.40886e-09	0.0186206	3.37348e-10	4.06746e-08	7.21774e-06	3.1098e-08
IgG4_G0F	1.21687e-16	9.76617e-20	9.00704e-14	2.45084e-15	3.11566e-11	7.52482e-11	2.92355e-10	5.44568e-11	6.42223e-11	7.24189e-11	6.77456e-09	1.15114e-16	1.18764e-19
IgG4_G1F	0.00250228	0.000133672	0.260737	0.0419409	0.166977	0.0493395	0.274385	0.0495736	0.191643	0.0944863	0.0227851	0.0026243	0.000147015
IgG4_G2F	0.0408718	0.409952	7.42109e-05	0.00630402	0.00559106	0.0894283	0.0017728	0.076035	0.0040946	0.0406634	0.473185	0.0393767	0.398735
IgG4_G0FN	1.00495e-19	1.12198e-24	1.31492e-15	2.49067e-18	1.7038e-13	5.53567e-13	8.91666e-12	3.13679e-13	4.38799e-14	4.29352e-13	1.05769e-10	8.53751e-20	1.40822e-24
IgG4_G1FN	2.95556e-05	1.66792e-06	0.0508031	0.00730514	0.0527005	0.0137105	0.0954697	0.0123351	0.0113752	0.0333528	0.00468844	3.18164e-05	1.90636e-06
IgG4_G2FN	0.165918	0.595241	0.00182056	0.0214131	0.0172545	0.124946	0.00803584	0.130265	0.837772	0.0685718	0.522192	0.160527	0.581626
IgG4_G1FS	0.00615351	0.000216089	0.334518	0.0481602	0.214569	0.0567531	0.353668	0.0541576	0.0735425	0.0959111	0.0252052	0.00634885	0.000235474
IgG4_G2FS	0.0110562	0.247308	2.3106e-05	0.00315916	0.00314287	0.0581126	0.000570543	0.0474949	0.000905075	0.0367098	0.346616	0.0107524	0.239687
IgG4_G1FNS	0.0201067	0.00433057	0.54038	0.226409	0.394433	0.197095	0.554212	0.184399	0.000718551	0.30236	0.12356	0.0208565	0.00460913
IgG4_G2FNS	0.600842	0.489991	0.195651	0.278842	0.205422	0.572352	0.142463	0.600611	0.010248	0.444021	0.969006	0.611275	0.502727

## Sheet: CRC_pval
	Quotient	QuotientLog	TA	TALog	Qantile	QuantileLog	Raw	RawLog	Median	Rank	RankLog	TAQuotient	TAQuotientLog
FA1	0.446571	0.0414899	0.47082	0.0378941	0.124263	0.24318	0.299197	0.204391	0.226944	0.319035	0.597745	0.432052	0.0400809
A2	0.000196642	7.13752e-07	0.000197822	1.04218e-06	0.104879	0.038405	0.117178	0.0414559	0.052289	0.0448332	0.0925527	0.0002183	5.82578e-07
A2B	0.00247657	0.000140662	0.00322891	0.000121	0.20932	0.14709	0.162787	0.147296	0.237123	0.158582	0.452572	0.00235961	0.00011682
FA2	4.16075e-08	1.55627e-09	7.45704e-12	1.38925e-13	0.24547	0.114939	0.305375	0.116806	0.270121	0.108465	0.192249	2.69915e-08	9.68145e-10
M5	0.113367	0.00427214	0.114611	0.00466414	0.391207	0.359828	0.350118	0.338005	0.322426	0.39559	0.969376	0.108804	0.00366984
FA2B	1.11099e-15	1.34782e-17	1.51671e-18	7.9338e-21	0.185904	0.0514101	0.203258	0.0509612	0.0980619	0.0514568	0.0698681	6.75316e-16	6.70421e-18
A2G1	0.0628284	0.0390851	0.0601112	0.043225	0.594255	0.475556	0.573878	0.477753	0.155912	0.471075	0.818223	0.0579056	0.0350753
FA26G1	0.250862	0.363563	0.494834	0.488933	0.588494	0.949593	0.713998	0.960415	0.718232	0.971694	0.545184	0.313093	0.41786
FA23G1	0.787112	0.643372	0.320925	0.268836	0.711499	0.92553	0.885482	0.891163	0.915823	0.819657	0.543278	0.758209	0.59496
FA26BG1	4.78694e-06	3.62696e-06	1.09389e-06	6.50847e-07	0.648635	0.418644	0.756049	0.43276	0.623001	0.37925	0.619272	4.11404e-06	3.19331e-06
FA23BG1	1.10164e-10	4.70799e-11	2.98964e-10	5.21821e-11	0.532491	0.298116	0.523208	0.295941	0.021103	0.252203	0.666592	1.23571e-10	4.2726e-11
A2G2	4.27829e-05	4.24272e-05	0.00066784	0.000532554	0.323174	0.260958	0.332843	0.248352	0.700714	0.298167	0.194758	4.79998e-05	4.74794e-05
A2BG2	9.87374e-07	3.61695e-06	0.000259743	0.000229646	0.264087	0.318268	0.303184	0.33354	0.927692	0.336074	0.079417	1.3507e-06	4.05293e-06
FA2G2	1.08079e-23	2.55561e-20	3.41767e-23	2.40829e-20	0.0947988	0.107727	0.0711152	0.101455	0.0558662	0.131835	0.0537321	7.19304e-23	1.36565e-19
FA2BG2	3.73287e-06	1.03092e-05	7.96043e-05	0.000216343	0.311412	0.479261	0.3412	0.467982	0.103448	0.529473	0.339977	6.75362e-06	1.64649e-05
FA2G1S1	0.95203	0.854859	0.651224	0.540723	0.831429	0.919601	0.864042	0.925081	0.98659	0.829766	0.384108	0.893488	0.797646
A2G2S1	0.00163264	0.000988808	0.0384095	0.0272731	0.549981	0.70021	0.59521	0.70864	0.969749	0.741524	0.300169	0.00190778	0.00111516
FA2G2S1	8.17859e-19	3.53963e-18	1.93415e-17	6.26046e-17	0.137007	0.120649	0.089848	0.110718	0.0649021	0.140625	0.0289778	4.8203e-18	1.42225e-17
FA2BG2S1	0.0466466	0.0456314	0.065234	0.0876174	0.728705	0.792407	0.758549	0.799556	0.926911	0.865384	0.359148	0.055296	0.0539762
N.D.	0.00137056	0.00280877	0.00797149	0.00912673	0.309083	0.194228	0.47185	0.258137	0.726488	0.165267	0.0781582	0.00164749	0.00302183
A2G2S2	0.533161	0.358957	0.435504	0.275232	0.782368	0.841351	0.94299	0.792912	0.159037	0.770621	0.646427	0.489463	0.33287
A2BG2S2	0.238631	0.309732	0.294719	0.42762	0.594338	0.801999	0.388183	0.77602	0.720347	0.884166	0.261211	0.244821	0.32315
FA2G2S2	2.04607e-05	8.43307e-05	3.23655e-05	0.000127243	0.377433	0.312188	0.288377	0.291595	0.0385728	0.334354	0.0715375	2.47697e-05	0.000102507
FA2BG2S2	0.700596	0.572103	0.549179	0.409597	0.880414	0.848025	0.946039	0.849453	0.271852	0.757249	0.616757	0.658207	0.538948

## Sheet: LLS_pval
	Quotient	QuotientLog	TA	TALog	Qantile	QuantileLog	Raw	RawLog	Median	Rank	RankLog	TAQuotient	TAQuotientLog
H3N3	0.000755216	0.00114151	0.00951455	0.0121864	0.188416	0.271717	0.0836715	0.217258	0.246011	0.206901	0.339923	0.000856252	0.00121486
H3N3F1	0.033306	0.0485219	0.132564	0.144491	0.0765094	0.160829	0.0706953	0.168356	0.46558	0.16751	0.305125	0.0336441	0.046077
H3N3F1S1	0.0114133	0.0237887	0.0791135	0.164901	0.944655	0.900362	0.953117	0.936578	0.160172	0.795832	0.836861	0.012229	0.0260816
H3N3S1	0.0886036	0.117617	0.172821	0.294779	0.809084	0.896881	0.846433	0.929534	0.377128	0.99853	0.979248	0.0967088	0.124088
H3N4	5.56664e-27	1.20896e-30	2.46097e-20	1.35799e-22	9.65665e-14	9.8892e-13	1.86078e-13	4.8924e-13	0.0135399	6.83286e-13	2.06658e-10	4.90467e-27	9.82565e-31
H3N4F1	3.12566e-37	8.24413e-41	1.5862e-26	4.12672e-29	6.03978e-18	8.60257e-16	4.94346e-17	2.95061e-16	7.04295e-20	3.81641e-17	2.03823e-12	3.09217e-37	7.91776e-41
H3N4F1S1	0.0622424	0.128404	0.163996	0.210547	0.131063	0.276166	0.130484	0.258036	0.314437	0.294925	0.425705	0.0565218	0.118943
H3N4S1	0.146695	0.167113	0.282482	0.382514	0.591939	0.776213	0.684728	0.840498	0.218448	0.83977	0.937158	0.154897	0.17715
H3N5	1.58047e-52	1.84498e-60	1.97425e-36	2.43029e-41	4.03761e-21	8.69952e-18	1.40962e-20	5.00283e-18	0.0224222	1.47038e-20	2.07774e-13	1.80999e-52	1.3623e-60
H3N5F1	6.44654e-47	1.12592e-54	8.23105e-33	2.53033e-38	2.70491e-20	9.3768e-19	1.10621e-19	3.80575e-19	3.15552e-38	6.33738e-20	1.48565e-15	5.51753e-47	9.31515e-55
H4N2	0.205587	0.286025	0.457184	0.538228	0.532743	0.701737	0.579765	0.739279	0.231415	0.793262	0.861235	0.227337	0.301663
H4N3	0.642628	0.394572	0.722012	0.583739	0.652632	0.787237	0.67638	0.761133	0.172893	0.891322	0.888812	0.665049	0.409636
H4N3F1	6.05761e-25	1.51573e-23	1.15178e-11	2.76888e-10	0.000621617	0.0022526	0.000715858	0.00285756	0.006328	0.000535799	0.00874518	7.86207e-25	2.50828e-23
H4N3F1S1	3.72617e-07	1.40455e-06	0.00172877	0.0047011	0.343617	0.367546	0.365729	0.420289	0.0112739	0.249042	0.466763	4.53142e-07	1.81744e-06
H4N3S1	0.554765	0.592512	0.731382	0.857492	0.397746	0.57897	0.487811	0.624386	0.663156	0.635138	0.751591	0.589741	0.617086
H4N4	0.890337	0.695944	0.955341	0.891474	0.552248	0.651323	0.538439	0.641901	0.339166	0.635398	0.757843	0.907764	0.715094
H4N4F1	0.00270158	0.00147082	0.0294933	0.0288689	0.474125	0.397377	0.538263	0.408217	0.39156	0.293967	0.372322	0.00268204	0.00159988
H4N4F1S1	0.0013126	0.000848819	0.0488889	0.050306	0.945954	0.694493	0.955695	0.728864	0.0042236	0.606978	0.529958	0.00142006	0.000982192
H4N4S1	0.0261705	0.040279	0.0705129	0.0770004	0.0478856	0.153403	0.0557667	0.166755	0.0246099	0.112294	0.349596	0.0232212	0.036706
H4N5	2.95777e-16	2.70356e-16	1.13885e-09	4.91923e-10	2.10739e-06	2.39156e-05	2.13634e-06	3.11695e-05	0.478495	5.63473e-06	0.000430775	2.89124e-16	2.34584e-16
H4N5F1	0.308903	0.197507	0.536062	0.286323	0.216038	0.236043	0.216482	0.232082	0.342165	0.25511	0.281613	0.304396	0.189784
H4N5F1S1	2.23536e-17	1.25275e-18	1.37017e-11	2.12981e-12	2.40622e-08	5.26068e-07	4.76913e-08	2.34836e-07	0.00171786	1.69694e-08	1.26311e-05	2.53937e-17	1.22643e-18
H5N2	0.122631	0.138903	0.339076	0.415408	0.973329	0.922421	0.961305	0.910719	0.0387536	0.974543	0.829232	0.129814	0.147197
H5N3	0.000308261	0.000901581	0.0063263	0.026429	0.344825	0.471142	0.320794	0.476491	0.130519	0.503465	0.636974	0.00034768	0.00100782
H5N3F1	0.000153707	1.85e-05	0.00157451	0.0010413	0.0469676	0.0937024	0.0560507	0.0803215	0.181864	0.0266369	0.162632	0.000170911	2.06632e-05
H5N3F1S1	0.0104394	0.00249926	0.0320333	0.0144386	0.266947	0.25738	0.302759	0.259572	0.217206	0.223729	0.30203	0.0113351	0.00264797
H5N3S1	3.2781e-12	3.25202e-12	2.74043e-08	2.5564e-08	0.000233211	0.00172727	0.000301611	0.00231696	0.267471	0.00105578	0.0116545	2.62106e-12	2.45012e-12
H5N4	0.0409311	0.0724737	0.0682226	0.146618	0.945932	0.992312	0.933896	0.999352	0.798958	0.894606	0.905929	0.0451912	0.0773538
H5N4F1	1.15299e-52	1.39286e-50	2.09424e-30	1.21384e-27	7.26566e-12	3.61944e-09	1.07814e-11	5.08322e-09	3.10597e-21	3.47827e-10	2.24416e-06	1.81418e-52	2.39419e-50
H5N4F1S1	5.08606e-12	3.40594e-12	1.64795e-07	5.81549e-07	0.0793306	0.0831686	0.089074	0.0856626	0.0454149	0.0611115	0.121973	6.30539e-12	5.00477e-12
H5N4F1S2	0.702254	0.577823	0.362748	0.43682	0.166049	0.272874	0.17402	0.325546	0.17453	0.176412	0.38423	0.689724	0.560728
H5N4S1	0.876003	0.849342	0.590241	0.586467	0.207958	0.415818	0.231694	0.432743	0.232079	0.310935	0.69179	0.828298	0.816753
H5N4S2	0.163054	0.221762	0.271291	0.247307	0.567893	0.707015	0.572973	0.735775	0.577258	0.638669	0.838127	0.178126	0.234769
H5N5	0.000424647	0.000868027	0.006406	0.013545	0.31732	0.309201	0.323068	0.330321	0.169862	0.26628	0.350156	0.000480898	0.000957665
H5N5F1	4.6421e-10	4.54853e-09	3.87241e-06	4.55362e-05	0.045402	0.0711715	0.0411338	0.0730867	1.06232e-08	0.074917	0.15749	5.63749e-10	5.73083e-09
H5N5F1S1	0.0198228	0.0228646	0.0647769	0.0839817	0.613422	0.627735	0.592826	0.631276	0.474649	0.71745	0.730037	0.0207562	0.0245624
H5N5F1S2	0.33126	0.469531	0.303588	0.404452	0.158936	0.39338	0.146556	0.376197	0.145864	0.183896	0.644597	0.323067	0.457688
H5N5S1	0.129302	0.118627	0.294537	0.314651	0.982658	0.928739	0.983984	0.982477	0.0314718	0.950337	0.981575	0.135701	0.125704
H5N5S2	8.12299e-06	1.77697e-05	0.000116543	0.000327747	0.197342	0.267228	0.188428	0.293481	2.35529e-05	0.143376	0.374378	9.7509e-06	1.98443e-05
H6N2	5.20826e-07	1.95007e-06	0.000313477	0.00128664	0.124664	0.180406	0.125966	0.210865	6.50092e-08	0.12946	0.308781	6.11671e-07	2.30039e-06
H6N3	1.40686e-19	7.86904e-20	5.9524e-09	1.98216e-09	6.86862e-05	0.000598431	9.48533e-05	0.000814556	0.90023	0.000344244	0.0048756	1.25541e-19	6.46395e-20
H6N3S1	0.00427782	0.00453605	0.0186295	0.0161861	0.0274377	0.0843248	0.0353261	0.103102	0.686592	0.0654674	0.199335	0.00385775	0.00402026
H6N4F1S1	0.0900846	0.167705	0.168225	0.237075	0.997824	0.843935	0.918691	0.85937	0.165073	0.826923	0.692847	0.0910589	0.17404
H6N5F1S1	0.000392738	0.000534555	1.98014e-05	6.74104e-05	0.00358762	0.0178722	0.00329262	0.0202373	0.0016124	0.0125156	0.0741233	0.000351328	0.000491615
H6N5F1S2	0.000345132	0.00056218	2.72806e-06	2.26706e-05	0.00233541	0.0102916	0.00196167	0.00833168	0.00174327	0.00516496	0.035659	0.000300576	0.000528074
H6N5F1S3	0.000353654	0.000415115	4.09202e-06	2.32308e-05	0.00184731	0.00518405	0.00180055	0.00446215	0.00170698	0.00247378	0.0176592	0.000308971	0.000393144
H6N5S1	0.00200162	0.00238525	0.00032787	0.000203481	0.302427	0.337742	0.32594	0.358496	0.210175	0.442896	0.450747	0.00220069	0.00253891
H6N5S2	0.00119403	0.00165396	1.57779e-05	1.37064e-05	0.341456	0.256338	0.359899	0.269361	0.338734	0.351305	0.258404	0.0013396	0.00173982
H6N5S3	0.000384148	0.00061204	2.4225e-06	2.13914e-06	0.228492	0.159712	0.236176	0.169502	0.227458	0.251661	0.164232	0.000439926	0.000643566
H7N2	2.4739e-08	2.18953e-08	0.000128197	0.000155344	0.116796	0.128795	0.131912	0.14926	0.0178151	0.097353	0.192176	3.23162e-08	2.82313e-08
H7N6F1S1	1.61743e-06	1.59157e-06	1.10202e-08	4.66525e-08	0.000134047	0.00128416	9.08374e-05	0.000886619	9.9147e-06	0.00049884	0.00885909	1.44499e-06	1.45081e-06
H7N6F1S2	2.05617e-06	1.40674e-06	3.10282e-09	1.0372e-08	0.000135829	0.000669773	0.000122325	0.00040821	5.98678e-05	0.000259832	0.00323023	1.76406e-06	1.29384e-06
H7N6F1S3	1.18159e-05	2.41403e-06	1.48813e-08	7.4503e-09	0.000244127	0.000614445	0.000267693	0.000472782	0.000149127	0.000269731	0.00257986	1.04668e-05	2.23623e-06
H7N6F1S4	7.54349e-05	7.28066e-06	1.98969e-07	2.83639e-08	0.000493503	0.00067411	0.000798293	0.000619043	0.00047124	0.000409844	0.00209809	6.74947e-05	6.73745e-06
H7N6S1	0.99645	0.657204	0.96359	0.68958	0.4536	0.843649	0.382823	0.816878	0.508816	0.677398	0.916291	0.988816	0.667157
H7N6S2	0.832587	0.56908	0.911486	0.561848	0.513291	0.896381	0.4485	0.847351	0.483279	0.711971	0.922072	0.853596	0.579061
H7N6S3	0.476592	0.321893	0.468301	0.257186	0.68081	0.936312	0.632036	0.97575	0.674435	0.852518	0.749031	0.494748	0.329426
H7N6S4	0.61041	0.575001	0.355671	0.343724	0.251364	0.387415	0.239184	0.364447	0.251997	0.347446	0.559519	0.589768	0.563257
H8N2	4.85448e-13	1.49385e-13	1.46494e-06	9.61392e-07	0.0423608	0.0528592	0.0465555	0.0670693	0.000101276	0.0384383	0.0980392	7.9582e-13	2.12955e-13
H8N3	2.14704e-10	4.14707e-13	2.30522e-08	4.64799e-10	7.19836e-06	0.000157461	6.7792e-06	5.63128e-05	0.118771	3.98641e-05	0.00331001	2.49037e-10	4.96199e-13
H9N2	0.169109	0.221137	0.459589	0.455355	0.415881	0.720745	0.490319	0.769772	0.250423	0.700557	0.964781	0.179296	0.233947

## Sheet: Korcula2013_padj
	Quotient	QuotientLog	TA	TALog	Qantile	QuantileLog	Raw	RawLog	Median	Rank	RankLog	TAQuotient	TAQuotientLog
IgG1_G0F	9.83593e-05	9.8108e-06	3.61733e-07	7.44111e-08	0.0574663	0.0559518	0.0657758	0.0589536	0.0538216	0.0688122	0.115428	5.73227e-05	5.79086e-06
IgG1_G1F	0.193648	0.208356	0.159228	0.177954	0.113325	0.088046	0.106095	0.102228	0.130181	0.0776384	0.179333	0.236845	0.253704
IgG1_G2F	3.21508e-07	3.35075e-08	1.43255e-07	9.13476e-08	0.000199432	0.000227096	0.000165253	0.00023511	7.68188e-05	0.000271988	0.00212757	7.3077e-07	7.21791e-08
IgG1_G0FN	3.21508e-07	8.28945e-10	1.17012e-09	2.19713e-11	0.0021437	0.000847963	0.00484082	0.00121314	0.000949959	0.000979824	0.00607544	1.71114e-07	4.27647e-10
IgG1_G1FN	0.0823724	0.0454616	0.0453852	0.047006	0.99665	0.937221	0.976107	0.924832	0.943544	0.906839	0.876124	0.0577156	0.0349653
IgG1_G2FN	0.00486041	0.00201043	0.016218	0.00868107	0.0118558	0.00955368	0.0121865	0.00879391	0.0162479	0.0165706	0.022797	0.00852276	0.00317113
IgG1_G1FS	0.262493	0.217357	0.151014	0.127926	0.779696	0.718705	0.826611	0.74174	0.448489	0.611273	0.829322	0.23311	0.180284
IgG1_G2FS	1.68881e-06	3.0903e-07	7.44748e-07	1.14997e-06	0.000588227	0.000505805	0.000636899	0.000386147	0.000270374	0.000607045	0.00422582	3.39215e-06	4.95184e-07
IgG1_G1FNS	0.0956957	0.0476421	0.0660307	0.0570704	0.99665	0.937647	0.976107	0.924832	0.141327	0.906839	0.937938	0.071815	0.0356279
IgG1_G2FNS	0.034044	0.0299416	0.0684865	0.0662154	0.0564295	0.0467439	0.0492154	0.0443856	0.602868	0.049659	0.0974212	0.0445236	0.036153
IgG1_G0	0.00139754	7.88784e-06	0.00174848	1.62004e-05	0.0345261	0.014602	0.0973238	0.0175038	0.0045933	0.0165706	0.0259838	0.00111042	5.68831e-06
IgG1_G1	0.420785	0.255815	0.448199	0.300841	0.961713	0.937221	0.976107	0.924832	0.65355	0.906839	0.985109	0.382687	0.229075
IgG1_G2	0.0153131	0.0135144	0.046656	0.0446938	0.0276517	0.0279541	0.0246164	0.0265752	0.0261967	0.0331497	0.0642406	0.0213977	0.0164177
IgG1_G0N	2.31008e-05	3.03118e-08	6.23302e-05	9.13476e-08	0.00277777	0.0003793	0.0141499	0.000301434	0.000100416	0.00044351	0.000885626	1.90098e-05	2.342e-08
IgG1_G1N	0.0324756	0.00769109	0.0549971	0.021493	0.523063	0.455214	0.512851	0.430924	0.00136383	0.507897	0.442569	0.0288515	0.00576146
IgG1_G2N	0.905981	0.968172	0.952692	0.965757	0.525379	0.496437	0.56274	0.453815	0.218492	0.507897	0.552275	0.966365	0.963604
IgG1_G1S	0.127658	0.102199	0.107741	0.106161	0.99665	0.990814	0.976107	0.973463	0.159367	0.906839	0.937938	0.0998071	0.0826184
IgG1_G2S	0.0436114	0.0444212	0.107741	0.107886	0.0564295	0.0483217	0.0525509	0.0475161	0.943544	0.0529987	0.102095	0.0563597	0.0539793
IgG1_G1NS	0.0516827	0.074561	0.0549971	0.0952917	0.713034	0.93376	0.743066	0.924832	0.196469	0.906839	0.937938	0.0423028	0.0586842
IgG1_G2NS	0.209742	0.366312	0.22977	0.326942	0.99665	0.904429	0.976107	0.816322	0.196469	0.843533	0.758386	0.164599	0.312475
IgG2_G0F	0.00153606	0.000216004	3.84695e-06	5.727e-07	0.310366	0.276571	0.303549	0.257914	0.24338	0.39122	0.185295	0.00111042	0.000142039
IgG2_G1F	0.034044	0.0245127	0.00534405	0.00706184	0.056192	0.0451643	0.0404867	0.0443856	0.0415647	0.0351239	0.165454	0.0443513	0.0346118
IgG2_G2F	4.36393e-08	1.74943e-08	2.92533e-09	1.23007e-08	9.51127e-05	0.000124937	5.53489e-05	0.000131052	2.61921e-05	0.0001505	0.00212757	7.4013e-08	2.342e-08
IgG2_G0FN	1.61922e-05	3.24067e-07	3.97592e-07	2.14531e-08	0.0929307	0.0366655	0.092575	0.031097	0.0538216	0.0415661	0.0259838	9.03473e-06	2.08363e-07
IgG2_G1FN	0.0362102	0.0245127	0.016218	0.00868107	0.890522	0.990814	0.976107	0.937574	0.843361	0.906839	0.671536	0.0321801	0.0177165
IgG2_G2FN	0.000352512	0.000198469	0.00136251	0.000868873	0.00102782	0.000847963	0.001042	0.000963767	0.00257124	0.000979824	0.00818992	0.000523767	0.000285513
IgG2_G1FS	0.647578	0.352173	0.486674	0.34721	0.142958	0.0952853	0.174499	0.11312	0.196469	0.067412	0.227433	0.723201	0.430046
IgG2_G2FS	4.78194e-06	5.32044e-07	5.50294e-07	7.67877e-07	0.000309275	0.000227096	0.000324164	0.00023511	0.000153672	0.000271988	0.00422582	6.77384e-06	8.90973e-07
IgG2_G1FNS	0.259694	0.208356	0.247902	0.165134	0.957667	0.790731	0.897788	0.770545	0.196469	0.686187	0.749435	0.220066	0.173265
IgG2_G2FNS	0.0480677	0.0401495	0.0660307	0.0689957	0.0345261	0.0355411	0.0325985	0.031097	0.631969	0.0351239	0.0974212	0.0577156	0.0488291
IgG2_G0	0.057849	0.0192412	0.0901534	0.0245933	0.696561	0.503718	0.606232	0.370051	0.068216	0.659807	0.242756	0.0573641	0.0162608
IgG2_G1	0.259694	0.222116	0.303146	0.326942	0.0615866	0.0726778	0.0973238	0.138905	0.172337	0.049659	0.442569	0.269789	0.253704
IgG2_G2	0.00336394	0.000467387	0.016218	0.00436256	0.00255293	0.00296684	0.00484082	0.00479549	0.116951	0.00124777	0.0886708	0.00444499	0.000717044
IgG2_G0N	0.00200069	0.000127008	0.00534405	0.000356275	0.0808958	0.039451	0.0973238	0.0314804	0.0247679	0.049659	0.0261676	0.00180876	9.50642e-05
IgG2_G1N	0.686686	0.937968	0.772286	0.965757	0.464561	0.503718	0.409892	0.469951	0.550677	0.39122	0.937938	0.739558	0.963604
IgG2_G2N	0.261491	0.0401931	0.358862	0.0429266	0.99665	0.937221	0.976107	0.924832	0.190028	0.975921	0.758386	0.236845	0.0335744
IgG2_G1S	0.905981	0.948791	0.952692	0.903822	0.268351	0.276352	0.303549	0.364443	0.24338	0.195407	0.671536	0.846498	0.883313
IgG2_G2S	0.0516865	0.023545	0.0901534	0.0553216	0.00839137	0.010923	0.016847	0.0130509	0.946699	0.00700527	0.126249	0.0577156	0.0287478
IgG2_G1NS	0.0372676	0.0401495	0.0453852	0.0429266	0.193567	0.102491	0.140069	0.151413	0.196469	0.0852142	0.179333	0.035518	0.0353498
IgG2_G2NS	0.680733	0.550526	0.815248	0.652223	0.38134	0.251113	0.303549	0.212046	0.239427	0.271485	0.185295	0.801667	0.644719
IgG4_G0F	0.320614	0.208356	0.261643	0.172402	0.99665	0.93376	0.976107	0.836033	0.943544	0.906839	0.671536	0.302304	0.189565
IgG4_G1F	0.0331231	0.0973147	0.0365394	0.106161	0.0155869	0.0368596	0.0186186	0.0589536	0.0179513	0.0384155	0.242756	0.035518	0.108442
IgG4_G2F	0.000253421	0.000803366	0.00022235	0.00113721	0.000418349	0.000844238	0.000750327	0.00167081	0.00044912	0.000776433	0.0287101	0.000301181	0.00102575
IgG4_G0FN	0.0246827	0.0176924	0.0172512	0.0141292	0.398687	0.306122	0.35007	0.253577	0.162417	0.359868	0.252709	0.0218045	0.0156889
IgG4_G1FN	0.680733	0.937968	0.772286	0.965757	0.260786	0.355531	0.302571	0.453815	0.419399	0.359868	0.749435	0.723201	0.963604
IgG4_G2FN	0.0311268	0.0693711	0.046656	0.0952917	0.0155869	0.0347788	0.0223587	0.0443856	0.816559	0.0331497	0.185295	0.0327407	0.0778408
IgG4_G1FS	0.0790456	0.184169	0.0901534	0.178559	0.0355426	0.0533487	0.0413654	0.102228	0.101683	0.049659	0.268467	0.0802731	0.189565
IgG4_G2FS	0.000272854	0.000843849	0.000335351	0.00129947	0.000588227	0.000847963	0.00143201	0.00183273	0.000949959	0.000875538	0.0282656	0.000324284	0.00106995
IgG4_G1FNS	0.606017	0.649993	0.691341	0.713157	0.277433	0.290501	0.315772	0.352886	0.257923	0.263337	0.606623	0.638484	0.70264
IgG4_G2FNS	0.0331231	0.0813413	0.0549219	0.106161	0.0345261	0.0467439	0.0413654	0.0664615	0.41679	0.0458282	0.202545	0.035518	0.0913881
Number of statisticaly significant glycans	28	30	24	25	19	23	20	21	16	24	13	27	29

## Sheet: Korcula2010_padj
	Quotient	QuotientLog	TA	TALog	Qantile	QuantileLog	Raw	RawLog	Median	Rank	RankLog	TAQuotient	TAQuotientLog
IgG1_G0F	1.91357e-28	2.15053e-32	6.05338e-28	3.2199e-29	5.57905e-23	6.26902e-21	4.35716e-22	1.5167e-21	3.00581e-23	3.37353e-23	7.62367e-16	8.10645e-29	7.55875e-33
IgG1_G1F	0.163578	0.256656	0.0775767	0.0349229	0.00113843	0.00827838	0.00145119	0.00781888	0.00125628	0.0104203	0.0392495	0.151069	0.218406
IgG1_G2F	3.40209e-33	5.23819e-39	1.82546e-48	2.14527e-47	5.50697e-07	6.04629e-05	7.9222e-07	6.28592e-05	1.11129e-08	7.44432e-06	0.00272074	5.82435e-33	1.04901e-38
IgG1_G0FN	2.53851e-34	9.78369e-47	1.02403e-31	3.22124e-39	5.78092e-27	4.02158e-27	1.26475e-24	5.12277e-28	2.95749e-28	6.80888e-30	7.24119e-22	9.6195e-35	2.8277e-47
IgG1_G1FN	0.000284244	6.74884e-07	0.117541	0.106205	2.09553e-07	3.49236e-06	2.37332e-07	4.13692e-06	1.43755e-08	1.19744e-06	0.000114812	0.000216058	4.06522e-07
IgG1_G2FN	5.93778e-09	2.94925e-17	3.29004e-19	9.36462e-23	0.0209508	0.042301	0.0211323	0.0400219	2.41449e-09	0.0171735	0.0985465	7.72309e-09	5.40941e-17
IgG1_G1FS	1.19521e-07	5.88672e-11	1.49528e-05	9.81745e-05	1.87472e-09	6.72346e-07	2.16141e-09	4.25993e-07	1.12507e-14	1.41933e-07	0.000110676	8.63023e-08	2.81772e-11
IgG1_G2FS	4.7894e-15	1.83696e-25	8.65603e-31	7.03831e-32	0.00229645	0.00432457	0.00276071	0.00360076	0.000648539	0.00196874	0.0148326	4.98968e-15	2.50137e-25
IgG1_G1FNS	0.00111585	1.5153e-08	0.00868642	0.0115773	1.38146e-07	1.28984e-05	1.78096e-07	9.73168e-06	0.554226	2.88148e-06	0.000654769	0.000972689	7.77623e-09
IgG1_G2FNS	0.435215	0.00554474	0.000183301	1.47422e-06	0.226777	0.527166	0.217099	0.568879	0.14684	0.501554	0.775817	0.44625	0.00675415
IgG1_G0	1.58112e-19	1.74703e-39	1.76216e-14	8.34916e-27	1.21881e-22	1.55536e-23	1.23336e-17	2.20287e-24	4.84162e-24	2.67737e-25	2.93639e-19	1.44641e-19	1.10831e-39
IgG1_G1	0.277781	0.141238	0.904413	0.747887	0.00662042	0.00946233	0.0111968	0.00781888	0.0106275	0.0043588	0.0303695	0.260942	0.127043
IgG1_G2	7.22537e-13	5.8905e-15	1.60721e-14	2.01018e-16	0.000831861	0.00466474	0.000968616	0.00360076	2.348e-11	0.00277703	0.0223378	1.21372e-12	9.3756e-15
IgG1_G0N	1.65913e-32	1.78296e-51	1.79189e-23	1.05829e-35	5.78092e-27	7.65831e-29	1.6262e-22	3.70586e-29	5.78208e-12	7.41565e-30	3.73472e-24	1.54825e-32	9.63319e-52
IgG1_G1N	0.00066908	1.60355e-06	0.0608867	0.0328287	4.87985e-06	2.35749e-05	8.06294e-06	1.15982e-05	0.000900163	6.28572e-06	0.000346993	0.000561585	1.20535e-06
IgG1_G2N	8.73789e-05	2.81183e-05	4.02831e-07	8.79257e-08	0.44313	0.636616	0.457136	0.707906	0.0608762	0.403625	0.799836	0.000111499	3.63298e-05
IgG1_G1S	0.00590725	0.0108146	0.430649	0.806909	0.000213509	0.00946233	0.000140535	0.00570206	0.36372	0.00228551	0.0887171	0.006018	0.00855456
IgG1_G2S	3.07103e-18	1.65612e-21	2.39663e-19	1.93715e-21	0.000593192	0.00126614	0.00099568	0.00117462	1.27021e-16	0.000985067	0.00588188	4.19415e-18	2.33011e-21
IgG1_G1NS	0.885774	0.766564	0.237821	0.129934	0.0163875	0.0504132	0.0180014	0.0435019	0.177573	0.0288653	0.141319	0.870416	0.738671
IgG1_G2NS	0.0626165	0.0184307	0.000183301	0.000112622	0.146454	0.844293	0.0956019	0.823672	0.144849	0.456917	0.638608	0.0619256	0.0197187
IgG2_G0F	2.30998e-30	6.73256e-35	1.19746e-41	3.58793e-42	2.33358e-23	2.32716e-21	6.48093e-24	7.84182e-21	1.28837e-24	1.39696e-24	3.44906e-16	4.57307e-30	3.10913e-35
IgG2_G1F	0.948533	0.722248	3.84216e-06	6.22778e-06	0.0498484	0.0453424	0.0536715	0.0493128	0.0608762	0.0734628	0.0745413	0.870416	0.768274
IgG2_G2F	2.74859e-13	2.8638e-29	7.73742e-51	1.16355e-51	5.76015e-08	3.89128e-05	2.37332e-07	0.000155928	6.9716e-09	1.68482e-06	0.00367539	2.02262e-12	7.9292e-29
IgG2_G0FN	1.22417e-32	1.5897e-42	5.7037e-37	1.53313e-42	8.73704e-24	1.01146e-22	4.80089e-24	2.14162e-22	6.53237e-27	2.59933e-25	4.75809e-18	2.33294e-32	8.35622e-43
IgG2_G1FN	0.871107	0.606885	0.00105487	0.000112622	0.03648	0.0551671	0.0360066	0.0547644	0.0446738	0.0734628	0.114927	0.751103	0.667788
IgG2_G2FN	1.21859e-09	9.36372e-26	2.85636e-31	3.00212e-37	1.21576e-05	0.00023874	1.38954e-05	0.000285267	3.69609e-15	2.18963e-05	0.00459611	5.26962e-09	2.50137e-25
IgG2_G1FS	0.40211	0.593463	0.00781091	0.00392862	0.00703887	0.0183877	0.00658615	0.0226441	0.00595271	0.0114237	0.056948	0.347767	0.540231
IgG2_G2FS	1.84794e-07	1.71704e-23	3.4033e-34	2.11857e-38	0.000155062	0.00179031	0.000288158	0.00243842	6.45297e-05	0.000649047	0.0148326	6.25379e-07	3.40987e-23
IgG2_G1FNS	0.012564	0.0232841	0.771758	0.346705	0.000315593	0.00282062	0.000443432	0.00360076	0.423249	0.00176779	0.0195957	0.0101429	0.0197187
IgG2_G2FNS	0.00228229	1.49623e-10	6.20938e-15	1.06129e-19	0.392329	0.287125	0.411243	0.313263	0.0136582	0.256474	0.285701	0.00427995	2.54126e-10
IgG2_G0	5.35229e-11	1.09058e-19	7.86099e-07	1.13574e-11	8.42991e-12	1.43181e-11	7.76009e-09	3.64822e-12	1.55651e-09	1.83382e-12	2.75547e-09	5.80603e-11	8.72997e-20
IgG2_G1	0.146858	0.201447	0.0032354	0.00200627	0.417552	0.254149	0.529179	0.266917	0.20801	0.228593	0.233622	0.161006	0.218406
IgG2_G2	5.84754e-12	3.934e-14	2.37501e-14	1.65137e-18	0.0046344	0.042301	0.00498346	0.0272827	6.27259e-05	0.0167951	0.164663	1.29999e-11	8.22717e-14
IgG2_G0N	9.52302e-24	2.65805e-36	1.09351e-14	1.18965e-23	4.75477e-19	1.40634e-21	9.64174e-15	7.24286e-22	0.312066	4.3738e-22	9.91255e-19	9.52096e-24	2.97356e-36
IgG2_G1N	0.00210377	0.00036057	0.71101	0.394859	0.000363451	0.00019475	0.000443432	0.000192657	0.423249	0.000104583	0.00079263	0.00182636	0.000298059
IgG2_G2N	3.53228e-07	1.02658e-12	1.24946e-14	7.6035e-21	0.0103069	0.178953	0.0157856	0.145186	0.0548265	0.0750735	0.62874	1.01614e-06	2.57111e-12
IgG2_G1S	0.435215	0.587965	0.157292	0.136546	0.0705627	0.0780508	0.094316	0.0892227	0.468735	0.110253	0.127376	0.403693	0.540231
IgG2_G2S	1.17052e-10	3.75417e-31	1.37849e-28	4.19375e-35	1.09084e-06	3.62761e-05	1.12059e-06	2.79202e-05	4.83241e-23	9.68346e-06	0.000974694	4.83834e-10	7.79803e-31
IgG2_G1NS	0.0377405	0.0171654	5.86887e-08	1.93283e-06	0.817768	0.877188	0.94207	0.600122	0.113933	0.923881	0.739945	0.0521019	0.0197187
IgG2_G2NS	1.83205e-09	6.30746e-16	8.73713e-23	5.94741e-25	0.031974	0.0225031	0.0325342	0.0226441	0.0772949	0.0276752	0.0353391	6.17592e-09	1.18691e-15
IgG4_G0F	3.23339e-09	1.22137e-11	7.13911e-08	1.9162e-08	1.18705e-08	7.11768e-09	1.78096e-07	6.46463e-09	5.49834e-08	1.66412e-08	1.90604e-07	2.48747e-09	9.45284e-12
IgG4_G1F	0.723922	0.394802	0.347473	0.768684	0.135121	0.0480831	0.227996	0.0671652	0.277303	0.100729	0.0472534	0.704899	0.375225
IgG4_G2F	1.29561e-05	1.09253e-05	2.99517e-09	4.60279e-08	0.0561741	0.135153	0.0578915	0.101342	0.0062449	0.0974572	0.254375	1.24629e-05	1.28705e-05
IgG4_G0FN	1.31799e-16	5.75521e-18	2.52747e-14	2.4856e-13	1.40819e-12	9.31411e-12	4.69191e-11	3.29303e-12	5.47586e-13	6.27842e-12	2.61213e-09	6.48753e-17	4.17888e-18
IgG4_G1FN	0.0397987	0.0220771	0.482742	0.373561	0.00741745	0.00517141	0.0129362	0.00686972	0.014005	0.0148254	0.0117577	0.0356071	0.0197187
IgG4_G2FN	0.00149052	0.000791289	1.44725e-05	2.16727e-05	0.310147	0.225006	0.422306	0.244866	0.00595271	0.194893	0.22229	0.00154192	0.000895429
IgG4_G1FS	0.387385	0.201447	0.846349	0.895	0.0642273	0.0353447	0.0956019	0.0400219	0.20801	0.0734628	0.0414355	0.367387	0.194033
IgG4_G2FS	0.000869637	1.02885e-05	1.98457e-06	5.20853e-08	0.122986	0.117678	0.217099	0.100952	0.120243	0.100729	0.158416	0.000881039	1.20222e-05
IgG4_G1FNS	0.0946058	0.134106	0.430649	0.557551	0.0208815	0.0318283	0.0211323	0.0344658	0.280017	0.0652209	0.0634099	0.0890205	0.127043
IgG4_G2FNS	0.885774	0.436832	0.157292	0.0705012	0.417552	0.527166	0.446171	0.568879	0.125716	0.467378	0.664155	0.89396	0.455353
Number of statisticaly significant glycans	36	38	36	38	37	36	36	36	30	33	30	35	38

## Sheet: Split_padj
	Quotient	QuotientLog	TA	TALog	Qantile	QuantileLog	Raw	RawLog	Median	Rank	RankLog	TAQuotient	TAQuotientLog
IgG1_G0F	4.69333e-24	3.47735e-25	2.38631e-26	3.77884e-27	6.09894e-21	2.70671e-22	9.90962e-21	1.48018e-22	1.43612e-21	2.47494e-22	1.00973e-16	4.19714e-24	3.8415e-25
IgG1_G1F	0.00117172	0.000544547	1.55804e-07	4.46494e-08	0.034078	0.014283	0.0297497	0.017204	0.0356189	0.0130169	0.0212312	0.00115536	0.000519486
IgG1_G2F	1.52539e-66	1.96419e-68	8.47465e-73	4.97767e-72	1.84065e-40	3.73047e-44	1.51365e-42	1.04234e-43	2.29015e-46	8.30564e-45	7.11671e-33	9.31851e-67	1.70442e-68
IgG1_G0FN	9.30249e-47	2.03396e-59	2.16127e-46	1.45512e-55	2.46448e-38	6.49505e-45	1.75605e-36	3.81816e-45	1.66771e-39	2.09614e-45	3.82393e-37	8.41837e-47	2.31685e-59
IgG1_G1FN	1.43928e-07	1.52397e-07	0.000288492	0.000607823	4.50166e-05	9.38695e-05	2.90789e-05	8.53511e-05	8.17253e-06	7.80069e-05	0.00232609	1.46169e-07	1.59438e-07
IgG1_G2FN	6.04908e-19	2.19033e-21	2.83162e-17	1.54656e-19	2.65285e-09	5.8644e-11	9.42832e-10	4.1804e-11	1.40328e-11	2.32205e-10	2.45799e-10	4.69356e-19	1.84233e-21
IgG1_G1FS	0.0158499	0.0204517	0.15695	0.269517	0.0244995	0.0382587	0.0237336	0.0388703	0.00503786	0.0526939	0.114851	0.0156218	0.0211347
IgG1_G2FS	1.56914e-60	6.72694e-63	1.11417e-59	1.56001e-60	1.49376e-31	2.09802e-35	1.06436e-32	2.52235e-35	5.17007e-36	5.86408e-36	1.39542e-27	9.12223e-61	5.83612e-63
IgG1_G1FNS	9.1066e-05	0.000174444	0.0169708	0.0418986	0.000818032	0.0043356	0.00120783	0.00571934	0.0498112	0.00639487	0.076289	9.22477e-05	0.000180454
IgG1_G2FNS	3.05586e-08	9.22843e-10	3.38155e-08	7.9536e-10	0.00105846	9.83358e-05	0.000621861	6.43862e-05	0.411098	0.000225932	2.28206e-05	2.80677e-08	8.60015e-10
IgG1_G0	1.73995e-38	1.25452e-50	5.48392e-30	1.13149e-39	2.15373e-32	2.18909e-39	5.03454e-29	1.0486e-39	1.11859e-48	1.64028e-38	9.60951e-36	1.72143e-38	1.42996e-50
IgG1_G1	0.0167283	0.0221869	0.13378	0.242398	0.0622943	0.0382587	0.0688391	0.0431047	0.00941539	0.0423417	0.0493155	0.0166802	0.0227475
IgG1_G2	1.58764e-19	2.02352e-24	4.45968e-15	4.3375e-20	3.1722e-13	2.24863e-15	3.16762e-12	2.83459e-15	7.14423e-22	8.09937e-16	6.90909e-13	1.84254e-19	2.00878e-24
IgG1_G0N	2.3618e-50	1.51203e-72	2.65006e-38	9.97509e-59	3.79047e-43	2.5559e-55	5.66287e-34	1.61008e-56	1.2406e-34	2.29397e-55	2.088e-51	2.41198e-50	1.63228e-72
IgG1_G1N	1.70925e-10	2.99234e-12	3.00215e-06	5.05913e-07	9.98896e-07	4.11282e-08	2.54485e-06	3.09222e-08	1.99861e-15	3.51548e-08	1.12233e-07	1.78821e-10	3.22103e-12
IgG1_G2N	0.0764525	0.0390972	0.0339724	0.0116057	0.269843	0.217807	0.267025	0.220074	0.774674	0.269946	0.231425	0.0751654	0.0381789
IgG1_G1S	8.29313e-06	0.000166922	0.00106454	0.0187862	0.00129743	0.00280232	0.00100148	0.00508728	0.151789	0.00102726	0.0580404	8.45939e-06	0.000172383
IgG1_G2S	1.16637e-19	2.01883e-24	9.68541e-15	2.39575e-19	5.13695e-11	3.13458e-13	2.26446e-10	4.09148e-13	1.14404e-13	1.22414e-12	2.57371e-12	1.32002e-19	1.99936e-24
IgG1_G1NS	0.00324438	0.0553822	0.0476453	0.3529	0.00570588	0.0382587	0.0078254	0.111521	0.397276	0.0186179	0.486678	0.00348142	0.0563629
IgG1_G2NS	0.095198	0.0618086	0.00665203	0.00726614	0.569503	0.407628	0.486896	0.26887	0.664315	0.597374	0.231425	0.0922704	0.0614757
IgG2_G0F	1.55293e-46	1.2774e-47	1.70798e-65	4.46607e-66	2.73208e-33	5.93476e-37	4.56909e-33	5.83625e-37	8.4824e-34	5.44451e-37	4.45277e-29	1.58949e-46	1.3594e-47
IgG2_G1F	0.0530957	0.0201527	7.88801e-07	1.4491e-06	0.265019	0.142227	0.177574	0.131687	0.208621	0.10613	0.176598	0.0508836	0.0192142
IgG2_G2F	6.06592e-51	6.1715e-50	1.68862e-64	8.07088e-62	1.59942e-31	1.86506e-34	7.35827e-34	1.72348e-34	2.28952e-35	1.6512e-35	2.25637e-25	3.19875e-51	3.95947e-50
IgG2_G0FN	9.92832e-73	4.64928e-84	1.12828e-78	6.21883e-87	1.20404e-49	3.06361e-58	7.24552e-50	1.84226e-58	1.17313e-52	1.1249e-57	4.51509e-49	9.35906e-73	5.00909e-84
IgG2_G1FN	7.53682e-34	5.21142e-33	6.42513e-38	1.76715e-36	1.39979e-20	1.50347e-21	4.70109e-21	1.51781e-21	6.77105e-24	2.14759e-20	9.38469e-17	7.02889e-34	5.08347e-33
IgG2_G2FN	3.07387e-19	9.41546e-22	2.35814e-20	1.59563e-22	1.95803e-10	2.84784e-13	8.37095e-11	2.4832e-13	3.0262e-11	1.16257e-13	2.38364e-12	2.31994e-19	7.75958e-22
IgG2_G1FS	0.20665	0.041335	0.000333421	9.66009e-05	0.429925	0.190612	0.402217	0.20124	0.473093	0.134985	0.152692	0.206069	0.039813
IgG2_G2FS	1.0762e-38	2.79501e-44	6.76393e-48	4.02741e-51	7.99686e-25	3.65388e-29	3.50009e-26	2.93559e-29	2.71769e-27	4.97065e-31	3.90042e-23	7.86288e-39	2.02069e-44
IgG2_G1FNS	2.92851e-07	3.50883e-06	0.000308317	0.00137717	2.69568e-05	0.000495893	1.62758e-05	0.000300769	0.0557476	0.00165982	0.029832	3.1523e-07	3.64188e-06
IgG2_G2FNS	0.000224461	1.45452e-06	1.23486e-06	1.70817e-08	0.0109694	0.000589713	0.0199429	0.00086971	0.61354	0.000346643	0.000146246	0.000207585	1.33511e-06
IgG2_G0	4.62546e-14	5.93426e-17	1.64583e-10	2.46384e-12	9.22435e-11	8.25459e-13	3.71634e-10	4.57565e-13	3.76567e-17	9.16416e-13	5.7407e-12	4.9563e-14	6.35067e-17
IgG2_G1	0.0206643	0.0201923	0.00646865	0.00466845	0.0651909	0.116519	0.0509807	0.106788	0.0252823	0.10613	0.421861	0.020383	0.019697
IgG2_G2	6.35165e-24	2.2685e-27	2.4866e-20	1.32656e-24	7.98246e-17	9.81705e-17	1.28268e-16	7.7185e-17	1.65574e-22	1.03174e-17	4.24435e-11	6.32974e-24	1.97087e-27
IgG2_G0N	1.70043e-27	4.95565e-34	5.58305e-21	7.93767e-26	7.70406e-23	7.67827e-26	3.01986e-20	9.50955e-26	4.63998e-10	3.82955e-26	3.53256e-21	1.84948e-27	5.17436e-34
IgG2_G1N	2.53941e-07	6.93628e-08	0.00226327	0.000633032	0.000310433	3.77009e-05	0.000276604	4.14527e-05	0.00506692	1.87388e-05	4.38094e-05	2.79485e-07	7.21415e-08
IgG2_G2N	7.73644e-07	9.18039e-07	0.0143247	0.00280603	0.00277882	0.00051	0.00172018	0.000467039	0.216931	0.000650916	0.000210007	8.92596e-07	9.84754e-07
IgG2_G1S	0.449159	0.591559	0.0529416	0.121138	0.4766	0.847674	0.536683	0.929154	0.708651	0.983154	0.648308	0.441255	0.582714
IgG2_G2S	1.21597e-28	1.35795e-31	2.7357e-23	5.44525e-27	2.85677e-18	1.19452e-18	6.68671e-18	7.09455e-19	3.42725e-12	2.61439e-18	2.13317e-13	1.30686e-28	1.16994e-31
IgG2_G1NS	0.00180712	0.0627353	0.0518181	0.326413	0.00148823	0.00762554	0.00382756	0.0619898	0.393198	0.00221533	0.178032	0.0018899	0.0637563
IgG2_G2NS	1.15402e-16	1.40209e-16	1.80252e-20	1.69883e-20	9.98896e-07	1.806e-07	4.55497e-07	1.5291e-07	0.933924	4.23828e-07	2.39283e-06	9.21271e-17	1.23156e-16
IgG4_G0F	1.32552e-05	4.70578e-06	2.80064e-06	1.30643e-05	9.43026e-07	3.58069e-06	7.97747e-07	8.10748e-06	4.78267e-07	4.70767e-06	0.000337117	1.35123e-05	4.86884e-06
IgG4_G1F	0.0127232	0.0675078	0.00149497	0.0123109	0.0716201	0.115772	0.0630834	0.126988	0.0767162	0.106926	0.342133	0.0124409	0.0669085
IgG4_G2F	3.5544e-12	2.9436e-11	1.43035e-16	4.71519e-14	4.48862e-11	2.27148e-10	7.9713e-11	7.96035e-10	3.34154e-11	3.64954e-10	1.00328e-06	3.26731e-12	2.89242e-11
IgG4_G0FN	1.26163e-16	5.93426e-17	9.43156e-18	2.87621e-16	1.51941e-17	2.15538e-16	2.0762e-16	2.34173e-15	1.20865e-17	1.2291e-15	7.70747e-11	1.55645e-16	6.54091e-17
IgG4_G1FN	0.0841089	0.0618086	0.107945	0.195791	0.0244995	0.0516209	0.0199674	0.0682244	0.0123223	0.10613	0.155362	0.0870278	0.0615779
IgG4_G2FN	0.000273297	0.000448346	5.43412e-05	4.44404e-05	0.00456457	0.00231143	0.00816719	0.00251855	0.0550821	0.00116315	0.00662909	0.000262791	0.000442388
IgG4_G1FS	0.0540761	0.149735	0.0150813	0.0420741	0.278223	0.23596	0.257967	0.233178	0.362988	0.201352	0.37034	0.0532691	0.148624
IgG4_G2FS	4.98189e-12	6.9131e-12	8.99695e-16	1.95686e-14	3.03264e-10	2.27148e-10	1.26089e-09	4.68288e-10	6.44517e-10	2.04936e-10	1.7633e-07	4.8059e-12	6.79648e-12
IgG4_G1FNS	0.113656	0.145737	0.137018	0.331678	0.0534603	0.134487	0.0290836	0.154326	0.200883	0.238818	0.340971	0.117159	0.147108
IgG4_G2FNS	0.0158792	0.0106865	0.00646865	0.00230573	0.104622	0.0334053	0.177574	0.0302034	0.933924	0.0173086	0.0275346	0.0156218	0.0105801
Number of statisticaly significant glycans	42	42	44	43	39	40	40	38	32	39	35	42	42

[truncated: 3 more sheets: Vis_padj, CRC_padj, LLS_padj]
